# Supplementary material for: ZnO nanodisks decorated with Au nanorods for enhanced photocurrent generation and photocatalytic activity
Source: Royal Society of Chemistry journal article supplement (doi:10.1039/c7nj03968a), 2018-01-01
Supplement: c7nj03968a1.pdf [file c7nj03968a1.pdf]

## Supporting Information

### ZnO nanodisks decorated with Au nanorods for enhanced photocurrent generation and photocatalytic activity

Ping She<sup>a</sup>, Kongliang Xu<sup>a</sup>, Yinxing Shang<sup>a</sup>, Qinrong He<sup>a</sup>, Shan Zeng<sup>a</sup>, Shengyan Yin<sup>b</sup>, Guolong Lu<sup>a</sup>, Song Liang<sup>a</sup>, Hang Sun<sup>a,\*</sup>, Zhenning Liu<sup>a,\*</sup>

<sup>a</sup> Key Laboratory of Bionic Engineering (Ministry of Education), College of Biological and Agricultural Engineering, Jilin University, Changchun, Jilin Province 130022, PR China

<sup>b</sup> State Key Laboratory on Integrated Optoelectronics, College of Electronic Science and Engineering, Jilin University, Changchun, Jilin Province 130012, PR China

\*Corresponding author email: sunhang@jlu.edu.cn, liu\_zhenning@jlu.edu.cn

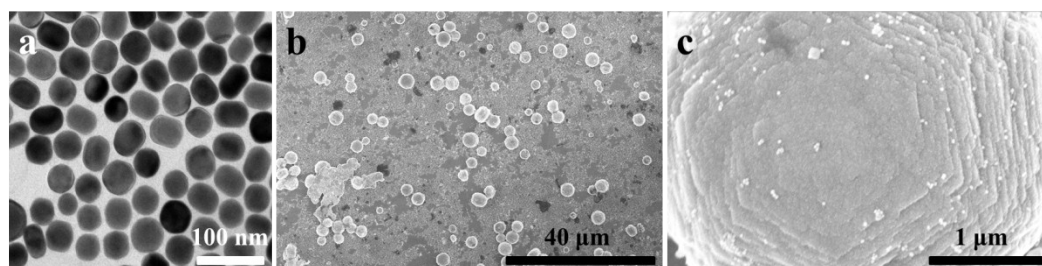

**Figure S1.** TEM image of AuNSs (a) and SEM images of AuNS/ZnONDK at lower (b) and higher magnification (c).

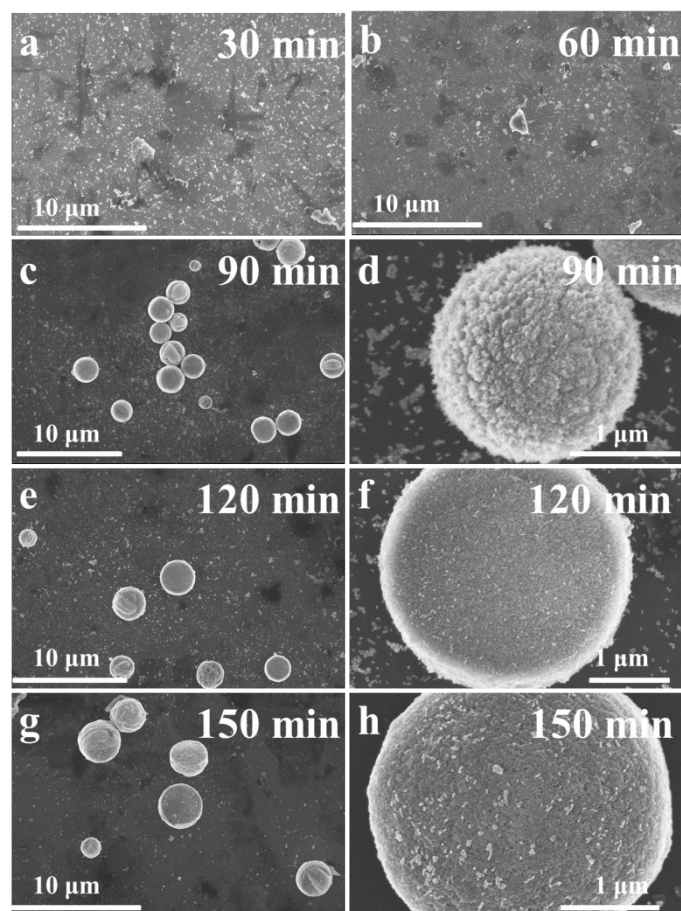

**Figure S2.** SEM images of AuNR-707/ZnONDK under different reaction time. (a) 30 minutes; (b) 60 minutes; (c, d) 90 minutes; (e, f) 120 minutes; (g, h) 150 minutes. (d), (f) and (h) are magnified images of (c), (e) and (g) correspondingly.
